# Supplementary material for: Phosphatidylinositol 3‐Kinase–DNA Methyltransferase 1–miR‐1281–Histone Deacetylase 4 Regulatory Axis Mediates Platelet‐Derived Growth Factor–Induced Proliferation and Migration of Pulmonary Artery Smooth Muscle Cells
Source: PubMed Central journal article supplement — J Am Heart Assoc. 2018 Mar 7;7(6):e007572. doi: 10.1161/JAHA.117.007572 (PMC5907547; doi:10.1161/jaha.117.007572), 2018-03-07
Supplement: JAH3-7-e007572-s001.pdf [file JAH3-7-e007572-s001.pdf]

# **SUPPLEMENTAL MATERIAL**

**Table S1. Information of Healthy donors and CHD-PAH patients providing serum for this project.**

| Healthy donor |        |                    | CHD-PAH patients |              |        |                    |                   |
|---------------|--------|--------------------|------------------|--------------|--------|--------------------|-------------------|
| NO.           | Sex    | Age                | NO.              | Patient's ID | Sex    | Age                | Diagnosis         |
| 1             | male   | 9 months           | 1                | 754937       | female | 1 years + 2 months | ASD, Mild PAH     |
| 2             | male   | 1 years            | 2                | 757064       | female | 11 months          | ASD, Mild PAH     |
| 3             | male   | 3 years            | 3                | 757808       | male   | 2 years + 6 months | ASD, Mild PAH     |
| 4             | female | 1 years            | 4                | 757833       | female | 1 years + 3 months | ASD, Moderate PAH |
| 5             | male   | 28 days            | 5                | 758474       | male   | 4 years + 7 months | ASD, Severe PAH   |
| 6             | female | 1 years            | 6                | 759373       | female | 9 months           | VSD, Mild PAH     |
| 7             | male   | 2 years            | 7                | 761435       | female | 7 months           | VSD, Mild PAH     |
| 8             | male   | 2 years            | 8                | 771706       | male   | 3 years + 1 months | VSD, Severe PAH   |
| 9             | male   | 3 months + 23 days | 9                | 785003       | male   | 5 months           | ASD, Mild PAH     |
| 10            | female | 3 years            | 10               | 789888       | female | 5 months           | VSD, Mild PAH     |
| 11            | male   | 16 hours           | 11               | 796058       | male   | 2 years + 9 months | ASD, Mild PAH     |
| 12            | female | 5 months + 9 days  | 12               | 797743       | male   | 1 years            | ASD, Mild PAH     |
| 13            | male   | 3 months+23days    | 13               | 799233       | female | 4 months           | VSD, Severe PAH   |
|               |        |                    | 14               | 804178       | male   | 3 months           | ASD, Mild PAH     |
|               |        |                    | 15               | 804421       | male   | 1 years + 7 months | ASD, Mild PAH     |
|               |        |                    | 16               | 804626       | female | 3 years            | ASD, Severe PAH   |
|               |        |                    | 17               | 804694       | female | 6 months           | VSD, Moderate PAH |
|               |        |                    | 18               | 805218       | female | 1 years            | VSD, Severe PAH   |
|               |        |                    | 19               | 805718       | female | 9 months           | VSD, Moderate PAH |
|               |        |                    | 20               | 805926       | male   | 4 years + 6 months | VSD, Severe PAH   |
|               |        |                    | 21               | 805929       | male   | 1 years + 3 months | VSD, Mild PAH     |
|               |        |                    | 22               | 806394       | male   | 6 months           | ASD, Severe PAH   |
|               |        |                    | 23               | 808020       | female | 9 months           | ASD, Mild PAH     |
|               |        |                    | 24               | 808091       | male   | 6 months           | ASD, Severe PAH   |
|               |        |                    | 25               | 810394       | male   | 1 years            | ASD, Moderate PAH |
|               |        |                    | 26               | 811536       | male   | 9 months           | VSD, Severe PAH   |
|               |        |                    | 27               | 811589       | female | 11 months          | VSD, Mild PAH     |
|               |        |                    | 28               | 812097       | female | 6 months           | VSD, Mild PAH     |
|               |        |                    | 29               | 813105       | male   | 5 months           | VSD, Severe PAH   |

**Table S2. List of primers for vector construction, mRNA/ miRNA retro-transcription and qRT-PCR.**

| Name                       | Sequence (5'-3')                                          | Purpose                                                          |
|----------------------------|-----------------------------------------------------------|------------------------------------------------------------------|
| rat-shHDAC4-P1             | ACCGTGATATGTTTCATGCAGCTGTGCTCGAGCAC<br>AGCTGCATGAACATATCA | Construction of shHDAC4 vector                                   |
| rat-shHDAC4-P2             | AAAATGATATGTTTCATGCAGCTGTGCTCGAGCAC<br>AGCTGCATGAACATATCA |                                                                  |
| rat-shDNMT1-P1             | ACCGTATTGGTGCATACTCTGGGCTCTCGAGAGC<br>CCAGAGTATGCACCAATA  | Construction of shDNMT1 vector                                   |
| rat-shDNMT1-P2             | AAAATATTGGTGCATACTCTGGGCTCTCGAGAGC<br>CCAGAGTATGCACCAATA  |                                                                  |
| rat-shEP300-P1             | ACCGGCCAGTCTATGGGTGTAATACTCGAGATT<br>TACACCCATAGGACTGGC   | Construction of shEP300 vector                                   |
| rat-shEP300-P2             | AAAAGCCAGTCTATGGGTGTAATACTCGAGAT<br>TTACACCCATAGGACTGGC   |                                                                  |
| hsa-HDAC4-3'UTR-F          | CGGAATTCATCTCCCTCCACGGGCCAGGCGAG                          | Construction of HDAC4-3'UTR vector                               |
| hsa-HDAC4-3'UTR-R          | CCGCTCGAGGAGGGCAAGTAACCGAGTCTTTA                          |                                                                  |
| hsa-PTPRD-3'UTR-F          | CGGAATTCGACTGATGAGGCATCTGAAGGA                            | Construction of PTPRD-3'UTR vector                               |
| hsa-PTPRD-3'UTR-R          | CCGCTCGAGTGATGTGCATTCCTCATTCC                             |                                                                  |
| hsa-WNT3A-3'UTR-F          | CGGAATTCCTGGGTGGAGCAGGACTC                                | Construction of WNT3A-3'UTR vector                               |
| hsa-WNT3A-3'UTR-R          | CCGCTCGAGCAGCCTACCCAGAGCCGTG                              |                                                                  |
| hsa-HDAC4-3'UTR-mut-F      | GTGTGTGCTCCATAGTCTCCGCTATTTTCCAAT<br>TGATGAGAATG          | Site-directed mutation of HDAC4-3'UTR<br>vector                  |
| hsa-HDAC4-3'UTR-mut-R      | CATTCTCATCAATTGGAAAATAGGCGGAGGACT<br>ATGGAGCACACAC        |                                                                  |
| hsa-PTPRD-3'UTR-mut-F      | CAACAGCCTCCGCCAAAGTATAAAGTGTGCTGCTA<br>ACATATATACATATAT   | Site-directed mutation of PTPRD-3'UTR<br>vector                  |
| hsa-PTPRD-3'UTR-mut-R      | ACTTTGGCGGAGGCTGTTGATTCCAAAAACAAA<br>ACAAAATAATAATTATC    |                                                                  |
| $\beta$ -ACTIN-mRNA-F      | AAAGACCTGTACGCCAACAC                                      | qRT-PCR analysis of ACTIN mRNA level<br>(reference control)      |
| $\beta$ -ACTIN-mRNA-R      | GTCATACTCTGCTTGCTGAT                                      |                                                                  |
| rat-HDAC4-mRNA-F           | ACTCTCTATGGCACAACCC                                       | qRT-PCR analysis of HDAC4 mRNA level                             |
| rat-HDAC4-mRNA-R           | GCAAAGCCATTCTTTAGCTCT                                     |                                                                  |
| rat-PTPRD-mRNA-F           | CGGTGTTGGAAGAAGTGGAGTC                                    | qRT-PCR analysis of PTPRD mRNA level                             |
| rat-PTPRD-mRNA-R           | TGCATAGTGATCAAAGCTGCC                                     |                                                                  |
| rat-KLF4-mRNA-F            | GAAGGTCTGGCCCGGAAAAGAAC                                   | qRT-PCR analysis of KLF4 mRNA level                              |
| rat-KLF4-mRNA-R            | GGTAGTGCCTGGTCAGTTCATC                                    |                                                                  |
| rat-Klf2-mRNA-F            | TGGAGCTGTTGGAGGCCAAGCC                                    | qRT-PCR analysis of KLF2 mRNA level                              |
| rat-Klf2-mRNA-R            | CTTGCGGTAGTGGCGGTAAGC                                     |                                                                  |
| rat-SMAD3-mRNA-F           | ACCAGGCTTTGAGGCTGTCTA                                     | qRT-PCR analysis of SMAD3 mRNA level                             |
| rat-SMAD3-mRNA-R           | GTGAGGACCTTGTCAGCCACT                                     |                                                                  |
| rat-CHOP-mRNA-F            | CTCTGCCTTCGCCTTTGAGAC                                     | qRT-PCR analysis of CHOP mRNA level                              |
| rat-CHOP-mRNA-R            | AGGGCTTTGGGAGGTGCTTGTG                                    |                                                                  |
| rat-TRIB3-mRNA-F           | TTCCGACAGATGGCTAGTGCG                                     | qRT-PCR analysis of TRIB3 mRNA level                             |
| rat-TRIB3-mRNA-R           | GATGGCCGGGAGCTGAGTATCT                                    |                                                                  |
| rat-VEGF-mRNA-F            | ACTGTGAGCCTTGTTCAGAGCG                                    | qRT-PCR analysis of VEGF mRNA level                              |
| rat-VEGF-mRNA-R            | GACATGGTTAATCGGTCTTTCC                                    |                                                                  |
| rat-GLUT1-mRNA-F           | ATGGTTCATTTGGCCGAGCTG                                     | qRT-PCR analysis of GLUT1 mRNA level                             |
| rat-GLUT1-mRNA-R           | CCGGCCTTTGGTCTCAGGAAT                                     |                                                                  |
| rat-HIF-1 $\alpha$ -mRNA-F | ACTATGTCGCTTTCTTGG                                        | qRT-PCR analysis of HIF-1 $\alpha$ mRNA level                    |
| rat-HIF-1 $\alpha$ -mRNA-R | GTTTCTGCTGCCTTGTAT                                        |                                                                  |
| miR-1281-RT                | GTGCAGGGTCCGAGGTCAGAGCCACCTGGGCAA<br>TTTTTTTTTTGGGAGA     | Retro-transcription of mature miR-1281                           |
| miR-328-RT                 | GTGCAGGGTCCGAGGTCAGAGCCACCTGGGCAA<br>TTTTTTTTTTACGGAA     | Retro-transcription of mature miR-328                            |
| snoRNA44-RT                | GTGCAGGGTCCGAGGTCAGAGCCACCTGGGCAA<br>TTTTTTTTTTTAGTCAG    | Retro-transcription of snoRNA44                                  |
| snoRNA202-RT               | GTGCAGGGTCCGAGGTCAGAGCCACCTGGGCAA<br>TTTTTTTTTTTCATCAG    | Retro-transcription of snoRNA202                                 |
| miR-1281-F                 | CCGGGTGCGCTCTCTCT                                         | Forward primer for qRT-PCR analysis of<br>miR-1281               |
| miR-328-F                  | CACCTGCGCTCTCTGCT                                         | Forward primer for qRT-PCR analysis of<br>miR-328                |
| snoRNA44-F                 | CATGAAGTCTTAATTAGCTCTA                                    | Forward primer for qRT-PCR analysis of<br>snoRNA44               |
| snoRNA202-F                | GTACTTTTGAACCTTTTCCAT                                     | Forward primer for qRT-PCR analysis of<br>snoRNA202              |
| miRNA/snoRNA-R             | CAGTGCAGGGTCCGAGGT                                        | Universal reverse primer for qRT-PCR<br>analysis of miRNA/snoRNA |
| CpG-F1                     | GGGGGGGGYGGGAGTTTTAGTATTGG                                | First round of PCR primer for CpG island                         |
| CpG-R1                     | CACCTACRAACCCTCTCTCTCC                                    |                                                                  |
| CpG-F1                     | GGGYGTGAGGGTT AGAGAGG                                     |                                                                  |
| CpG-R1                     | AATAACCRCACTAAACTCACCC                                    |                                                                  |
|                            |                                                           | Second round of PCR primer for CpG island                        |

**Figure S1. MiR-1281 does not influence the expression of contractile maker proteins in PSMCs.**

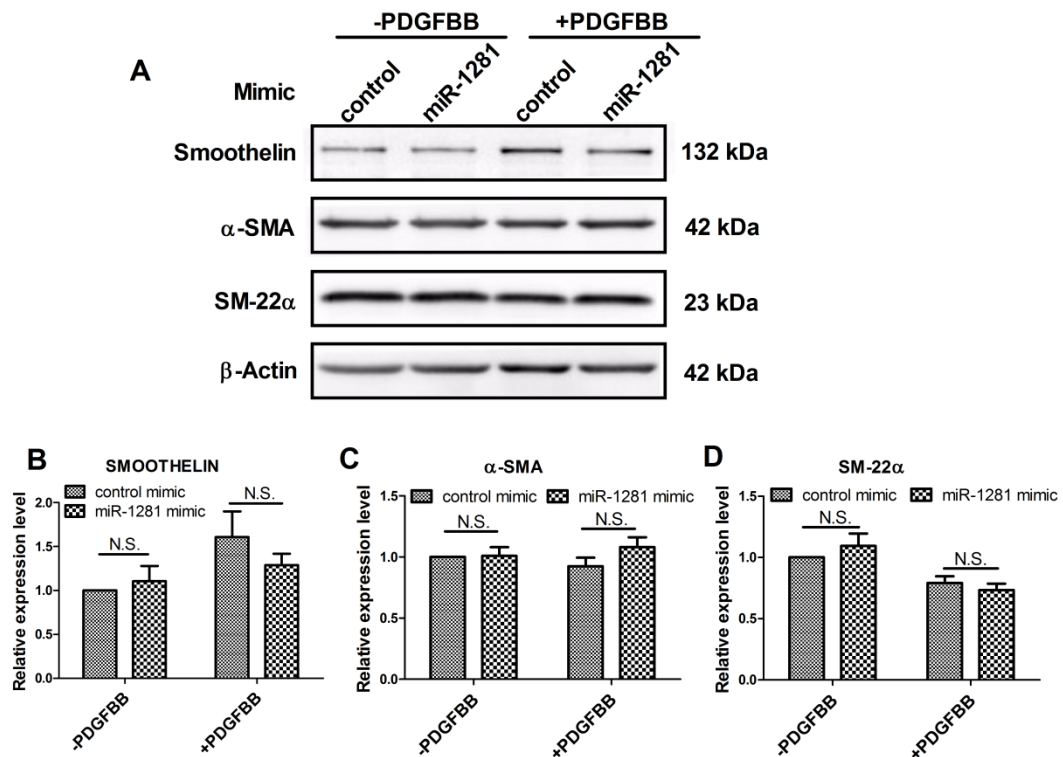

**A)** Representative figures of western blot assay on protein expression of Smoothelin,  $\alpha$ -SMA and SM-22 $\alpha$  in PSMCs transfected with either control mimic or miR-1281 mimic. Both culturing conditions without and with PDGFBB treatments were considered.  $\beta$ -Actin was used as loading control. Statistical analysis showing that the protein level of Smoothelin **B)**,  $\alpha$ -SMA **C)** and SM-22 $\alpha$  **D)** were not significantly altered by over-expression of miR-1281, under either culturing condition. N.S. indicates no significant difference.

**Figure S2. PTPRD is a direct target of miR-1281 but its expression is not primarily regulated by miR-1281 in PDGFBB-treated PSMCs.**

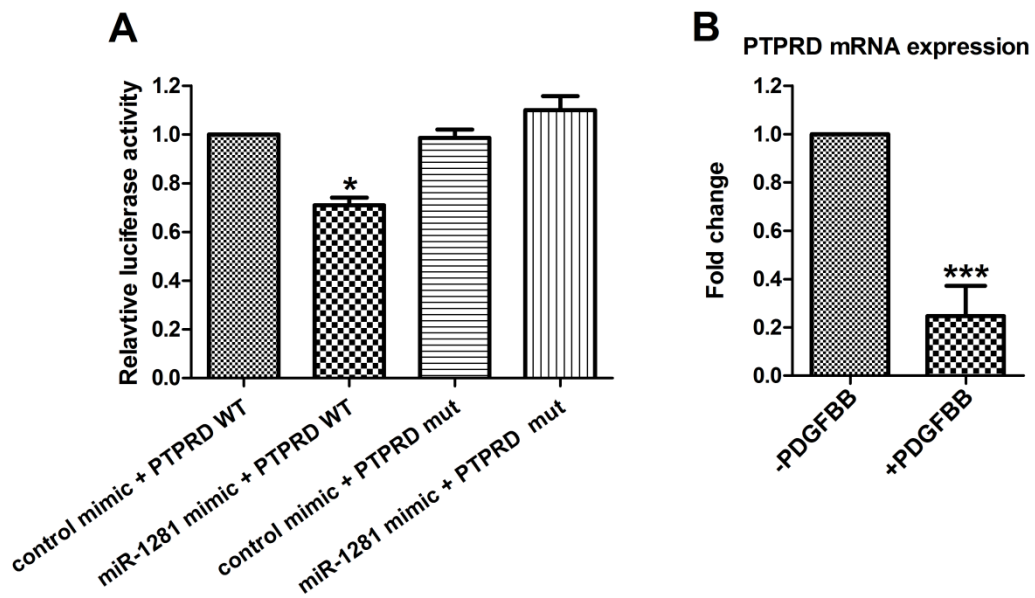

**A)** luciferase reporter assay demonstrating that PTPRD 3'UTR carries functional miR-1281 binding site, mutation of which abolished miR-1281 mimic inhibition of luciferase expression. However, **B)** qRT-PCR assay found that mRNA level of PTPRD significantly reduced in PDGFBB-treated PSMCs, suggesting its expression is not deregulated by reduced miR-1281 expression.

**Figure S3. HDAC4 promotes PASMCM proliferation and migration.**

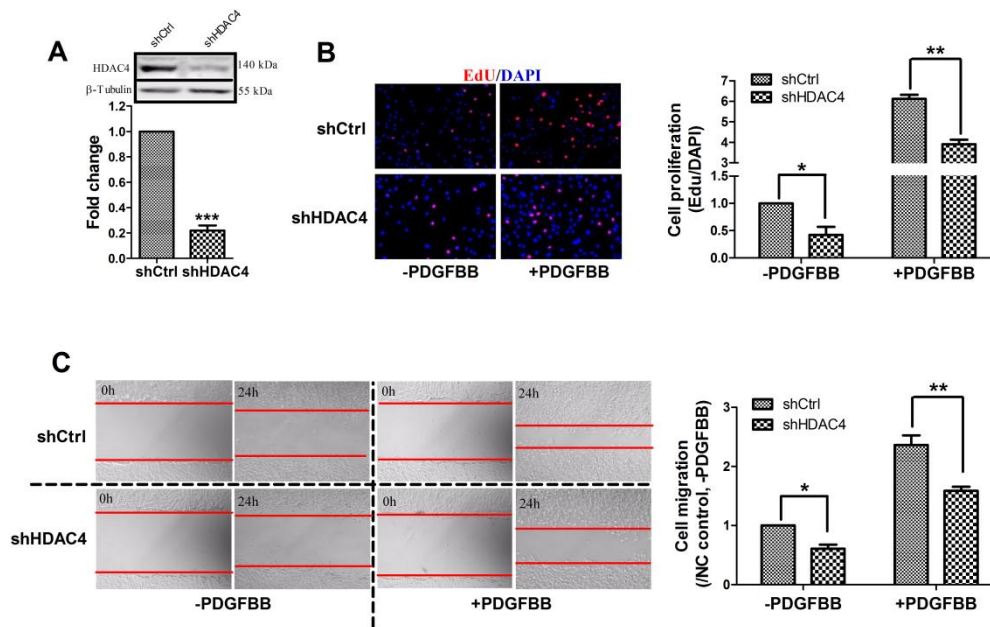

**A)** Western blotting analysis of silencing efficiency of shHDAC4 in PASMCMs.  $\beta$ Tubulin was used as loading control. **B)** Representative figures of EdU assay and statistic analysis showing that shHDAC4 suppressed PASMCM proliferation in the absence or presence of PDGFBB. **C)** Representative figures of wound-healing and statistic analysis showing that shHDAC4 suppressed PASMCM migration in the absence or presence of PDGFBB.

**Figure S4. Over-expression of miR-1281 does not significantly alter histone acetylation status of PSMCs.**

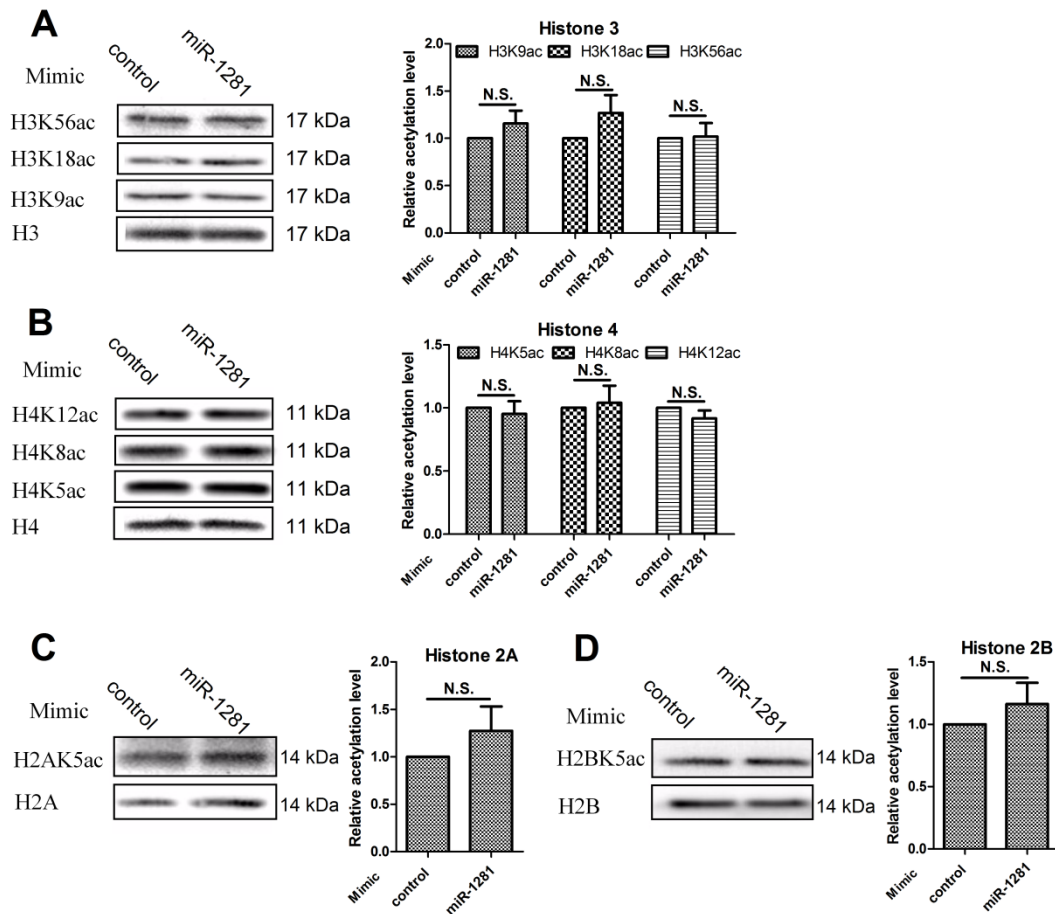

Western blot assay of acetylated Histone H3 **A**), H4 **B**), H2A **C**) and H2B **D**) were performed by examining respective acetylation sites (i.e. lysine residues as specified in each representative blotting figure, left panels). Corresponding total Histone was used as loading control. Statistic analysis found no significant difference of the acetylation status in miR-1281 mimic- or control mimic-transfected PSMCs. N.S. indicates no significant difference (right panels).

**Figure S5. EGR1 does not influence the expression of miR-1281 in PDGFBB-treated PSMCs.**

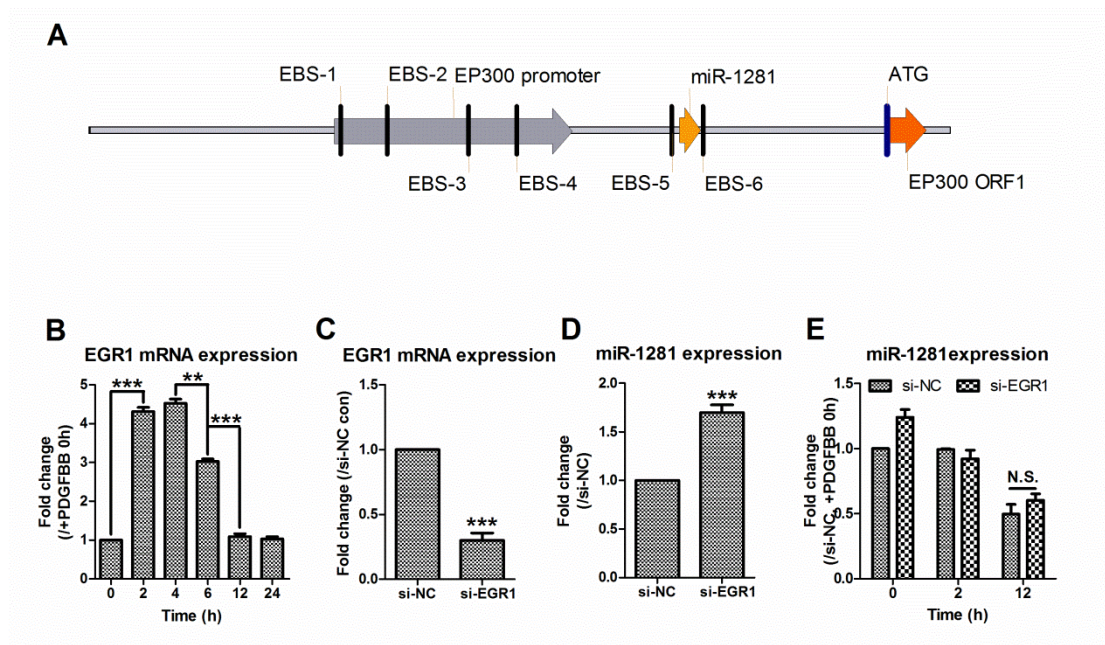

**A)** Illustration of EGR1 binding sites (EBS) identified in EP300 promoter and flanking regions of rat genome. **B)** Time-course assay of PDGFBB effect on EGR1 mRNA level in rat PSMCs. **C)** Transfection of si-EGR1 significantly inhibited EGR1 mRNA expression in PSMCs. **D)** This led to an up-regulation of miR-1281 expression; **E)** but effect of si-EGR1 did not influence the PDGFBB-repressed expression of miR-1281 at 12h.



**Figure S6. PDGFBB induces DNA methylation of CpG island 5' upstream of MIR-1281/EP300 gene.**

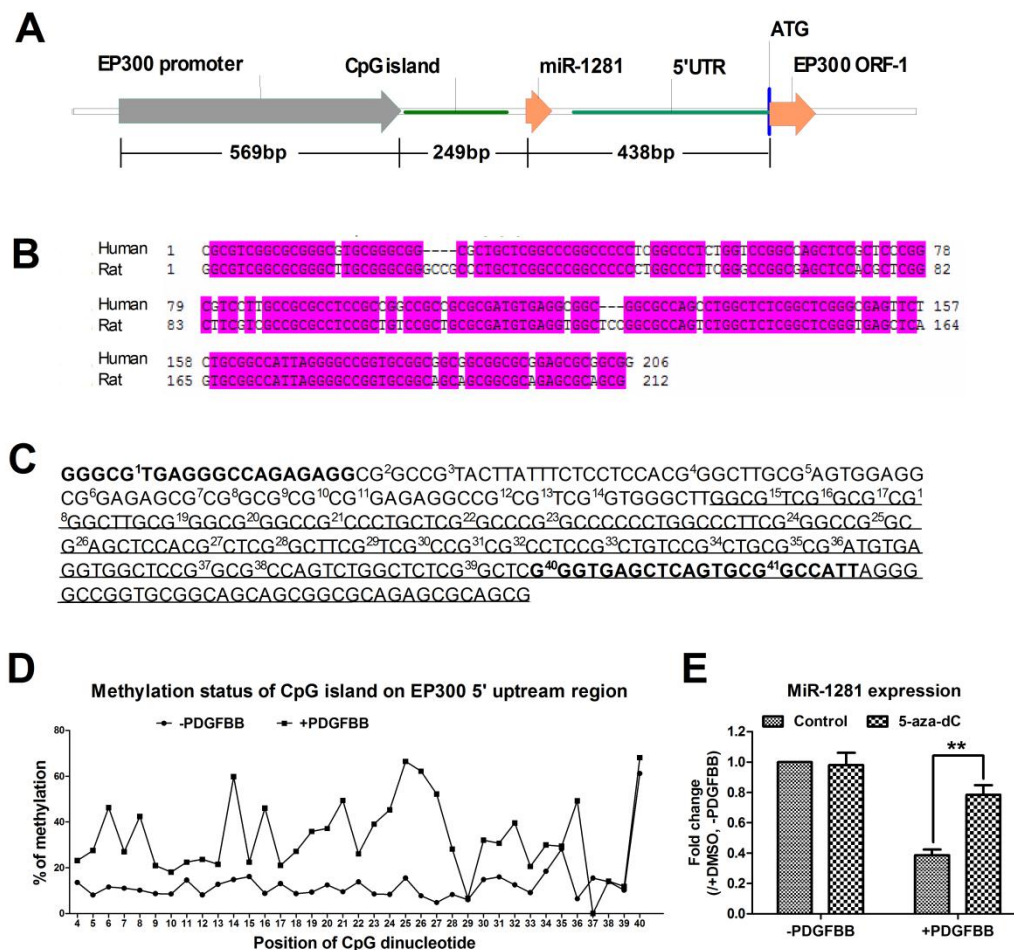

**A)** Illustration of location of predicted CpG island in the 5' upstream region of MIR-1281/EP300 gene. **B)** Sequence alignment of this CpG island between the human and rat genomes displayed high conservation. **C)** Detailed sequence information of bisulfite PCR amplified region. Bold black Sequence indicates the location where nested PCR primer annealing. CG dinucleotides are numbered for methylation analysis. Underlined Sequence indicates CpG island. **D)** Bisulfite sequencing showed enhanced DNA methylation at cytosine residues in CG dinucleotide sites of this CpG island. The line graph presents percentage of methylated cytosine in each CG dinucleotide in a sequential 5' to 3' order as numbered in C). **E)** Pre-treatment of 5-aza-dC treatment recovered PDGFBB repression of miR-1281 in PASCs.

**Figure S7. miR-1281/HDAC4 pathway influences the mRNA expression of HIF-1 $\alpha$  in PSMCs.**

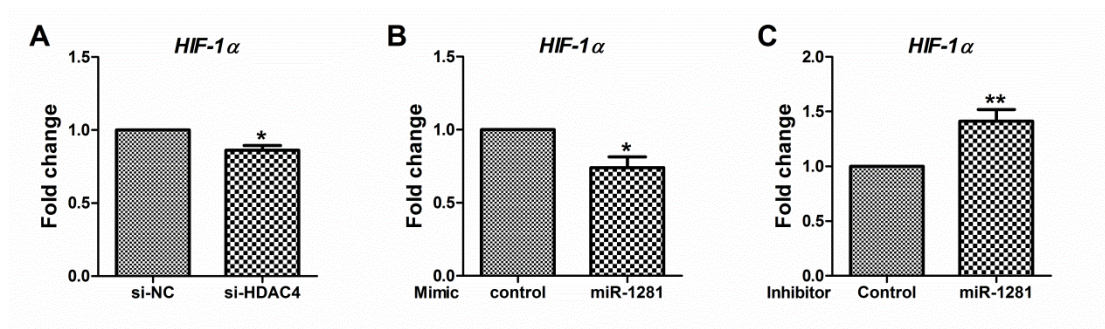

qRT-PCR analysis demonstrated that either inhibition of HDAC4 by si-HDAC4 **A**), or overexpression of miR-1281 by miR-1281 mimic **B**), decreased the mRNA level of HIF-1 $\alpha$  in PSMCs; and inhibition of miR-1281 by miR-1281 inhibitor increased mRNA level of HIF-1 $\alpha$  in PSMCs **C**).

**Figure S8. PDGFBB-induced downregulation of miR-1281 is a specific phenomenon in PASMCs.**

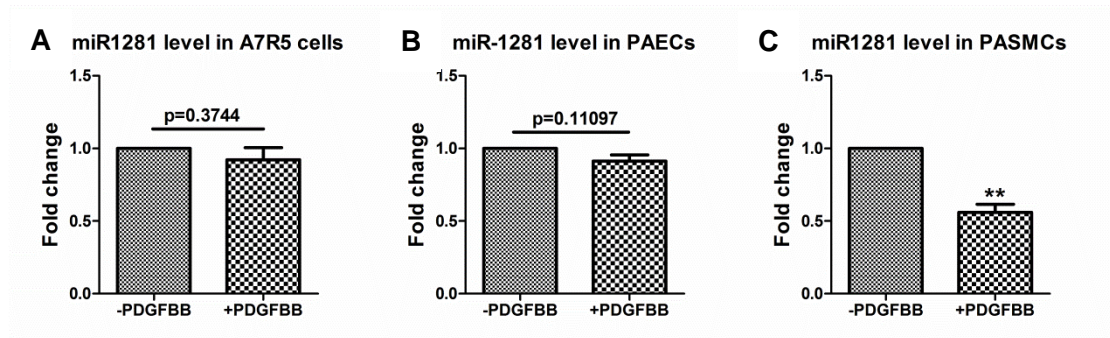

Aortic smooth muscle (A7R5) cell line, pulmonary arterial endothelial (PAEC) cells line, and PASMC cell lines were treated with PDGFBB (30ng/ml, 12h) respectively, qRT-PCR analysis found no change of miR-1281 level in RNA samples extracted from either PDGFBB-treated A7R5 **A**) or PAEC cells **B**), but significant reduction of miR-1281 level in PDGFBB-treated PASMC cells **C**). p values are presented to illustrate insignificant differences.

**Figure S9. Inhibition of PI3K kinase negatively influences the ERK phosphorylation.**

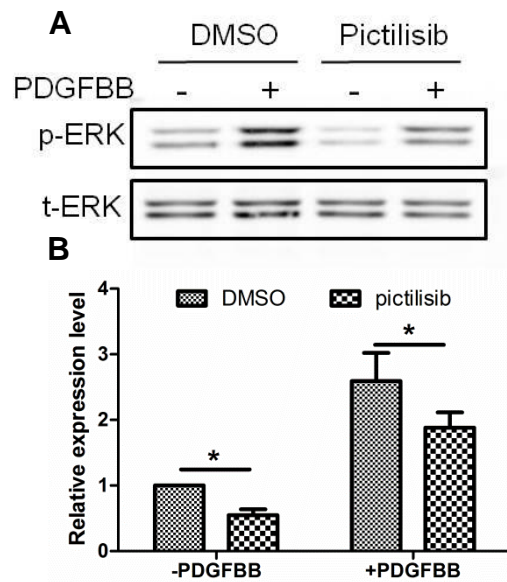

**A)** Representative figures of western blot assay on protein expression of phosphorylated ERK in PSMCs treated with PI3K inhibitor (Pictilisib) or DMSO (negative control). Both culturing conditions without and with PDGFBB treatments were considered. The total amount of ERK was used as loading control. **B)** Statistical analysis showing that PDGFBB treatment markedly induced ERK phosphorylation, while Pictilisib treatment decreased phosphorylation level of ERK in the absence of PDGFBB treatment, and attenuated the PDGFBB-induced ERK phosphorylation.

**Figure S10.** Expression of miR-1281 does not influence the expression of miR-328 in rat PSMCs.

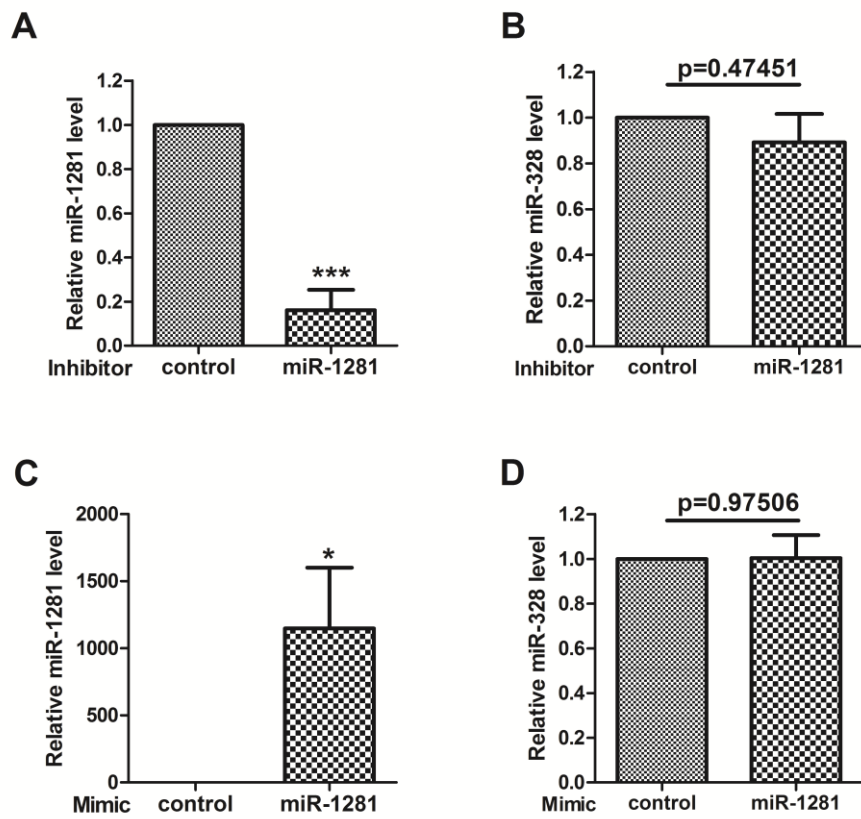

MiR-1281 inhibitor and mimic were transfected into rat PSMCs respectively. **A) & C)** qRT-PCR analysis of miR-1281 level verified the inhibition and overexpression efficacy. **B) & D)** qRT-PCR analysis of miR-328 level demonstrated that the change of miR-1281 expression does influence miR-328 level in PSMCs.

**Figure S11. miR-1281 and miR-328 are independent miRNAs in terms of regulating human PASC proliferation and migration.**

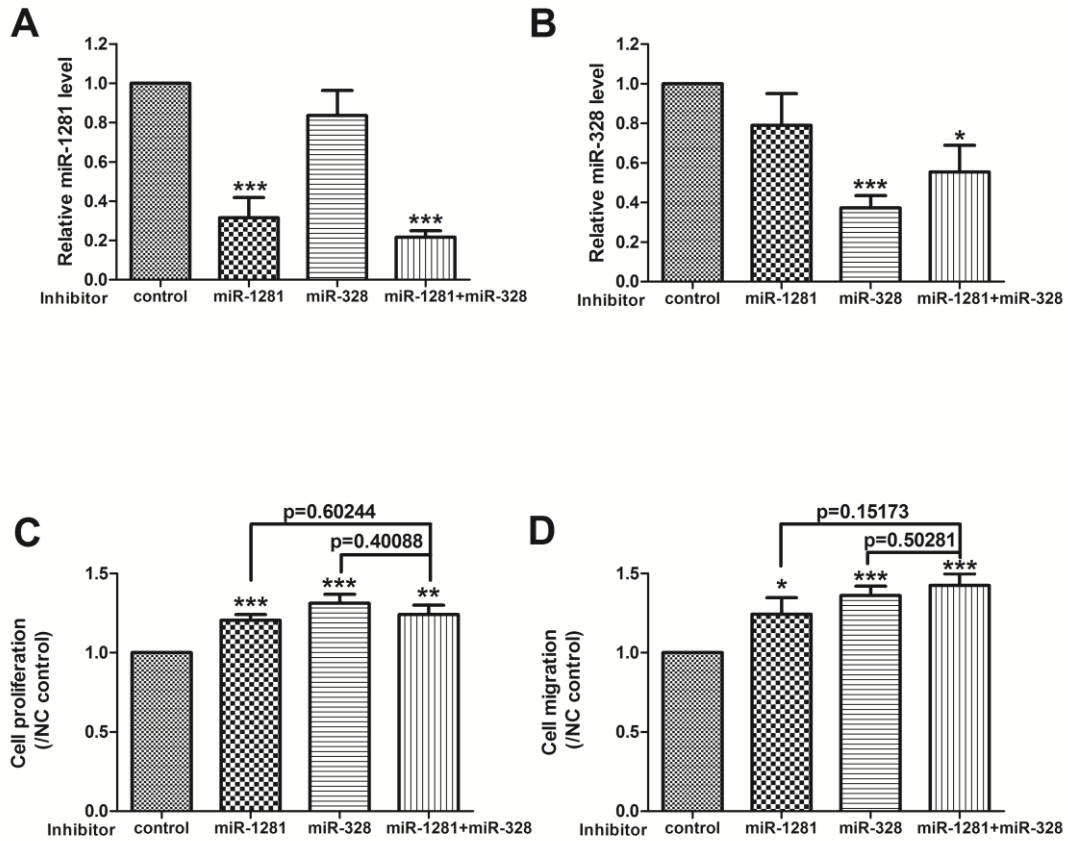

MiR-1281 inhibitor and miR-328 inhibitor were transfected individually or together into PASCs for 48h. qRT-PCR analysis in RNA samples extracted from these PASCs demonstrated that inhibition of miR-1281 would not influence the expression of miR-328 **A**), and vice versa **B**). Proliferation assay **C**) and migration assay **D**) performed on these cells demonstrated that simultaneous inhibition of both miR-1281 and miR-328 did not produce greater effect on PASC proliferation or migration than individual inhibition. Each result presents the statistic analysis based on four independent batches of experiments.

Figure S12. Validation of MCT-induced PAH rat model.

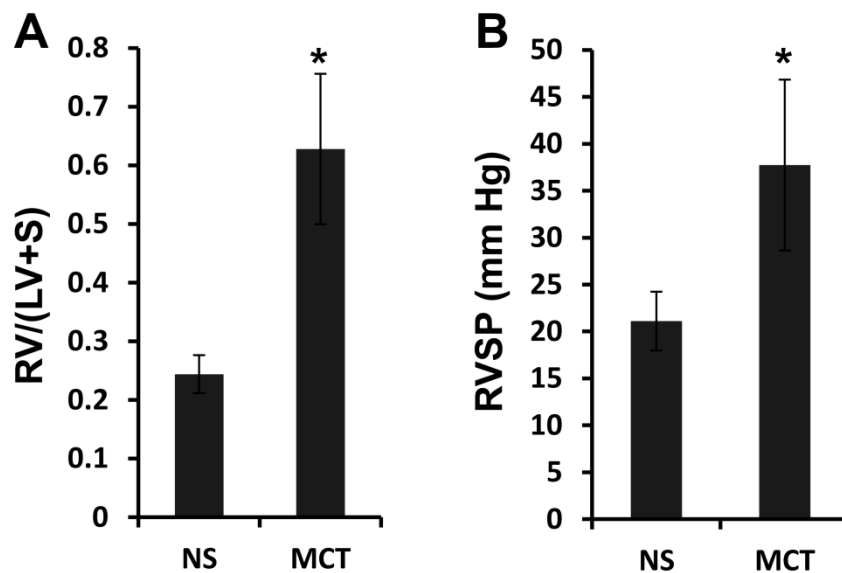

Rats injected with normal saline were used as control (NS). After 4 weeks, PAH development was assessed. Briefly, rats were anesthetized by an injection of pentobarbital sodium (30mg/kg), right jugular vein was surgically exposed and a 1.2-Fr pressure catheter connected to AP-621G (Nihon Kohden, Japan) was inserted into Right Ventricle (RV) through the incision in right jugular vein. Right Ventricular Systolic Pressure (RVSP) was recorded using MP150 system and AcqKnowledge software package (BIOPAC, Goleta, CA). To assess right ventricular hypertrophy, saline containing 5U/ml heparin was flushed into RV after death and the heart was removed. Then RV was separated from Left Ventricle (LV) and the ventricular Septum (S). Ratio of the weight of RV divided by that of LV plus S [RV/(LV+S)] was used to assess right ventricular hypertrophy. Both significantly higher RV/(LV+S) level (A) and higher RVSP level (B) of MCT-treated rat suggested an successful induction of PAH. (n=8)
